# Supplementary material for: Transcriptomic profile of cationic channels in human pulmonary arterial hypertension
Source: PubMed Central journal article supplement (PMC8338963; doi:10.1038/s41598-021-95196-z), 2021-08-04
Supplement: 41598_2021_95196_MOESM1_ESM.pdf [file 41598_2021_95196_MOESM1_ESM.pdf]

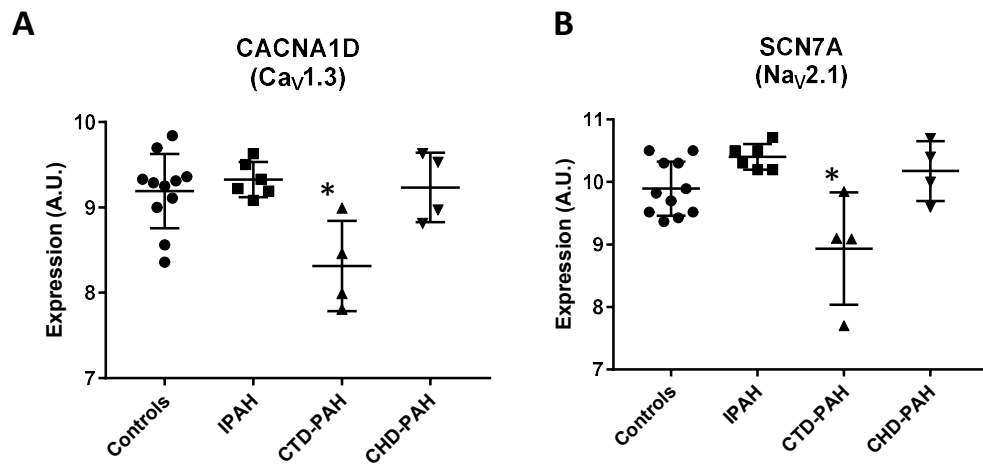

**Supplementary figure 1.** mRNA expression of CACNA1D and SCN7A genes in controls and patients with idiopathic PAH (IPAH), congestive tissue disease associated PAH (CTD-PAH) and congenital heart disease PAH (CHD-PAH). Results are shown as scatter plot and lines indicate means and SD.  $P < 0.05$  vs IPAH and CHD-PAH.

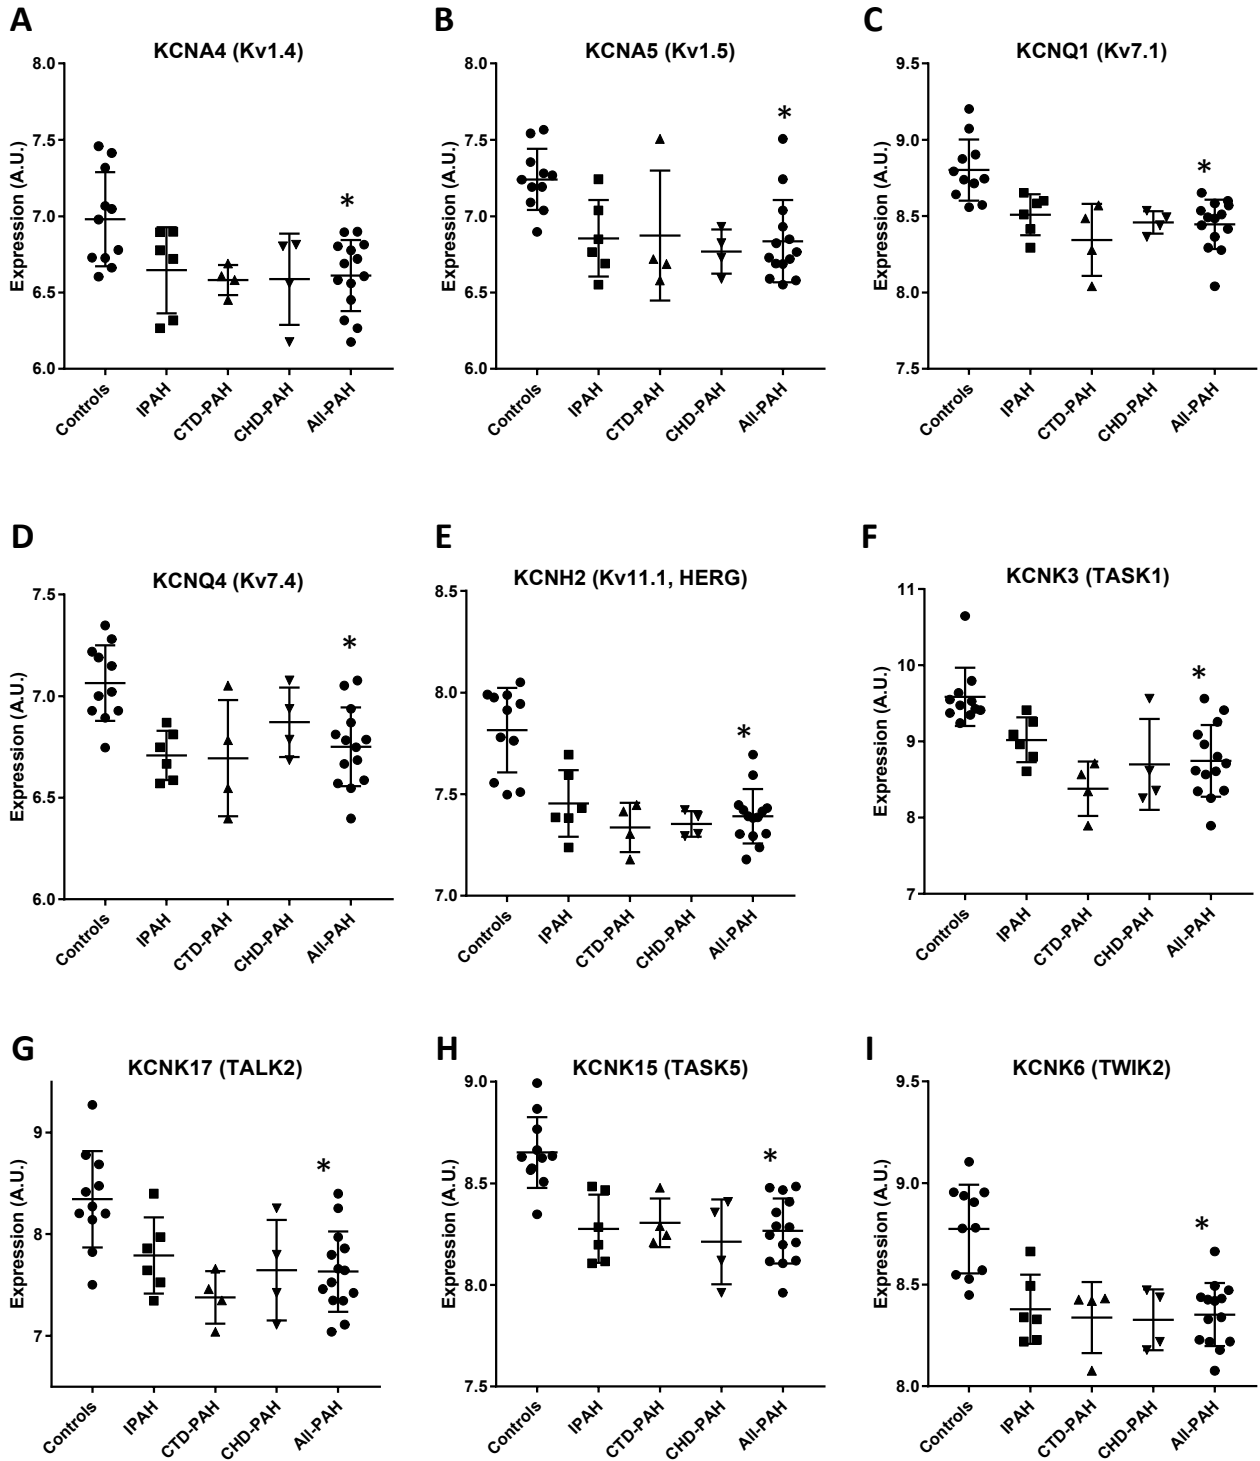

**Supplementary figure 2.** mRNA expression of K<sup>+</sup> channel genes with a large (> 2 fold) and significant (adjusted  $p < 0.05$ ) downregulation in controls and patients with idiopathic PAH (IPAH), congestive tissue disease associated PAH (CTD-PAH) and congenital heart disease PAH (CHD-PAH). Results are shown as scatter plot and lines indicate means and SD. \* Adjusted  $p < 0.05$ .

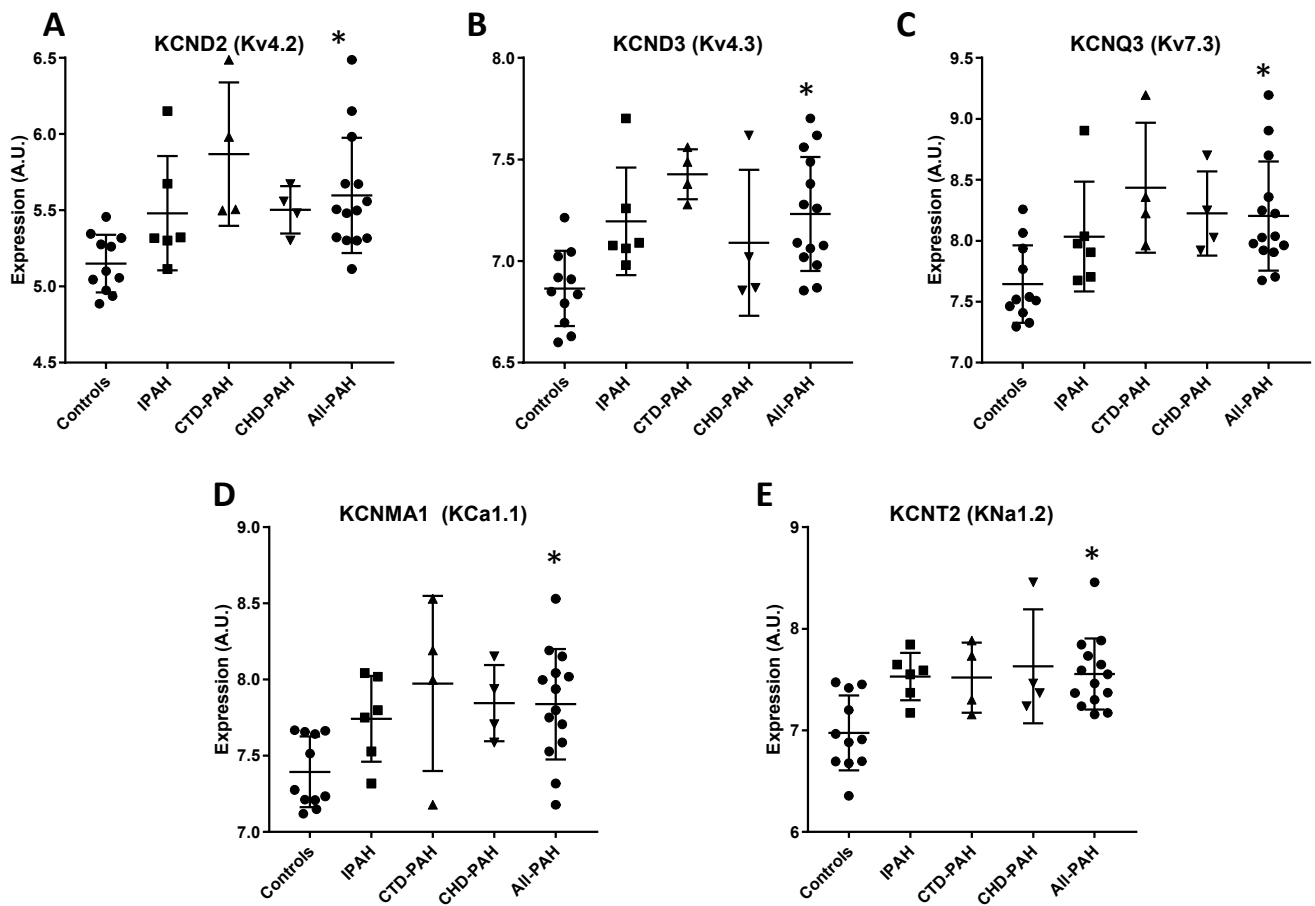

**Supplementary figure 3.** mRNA expression of K<sup>+</sup> channel genes with a large (> 2 fold) and significant (adjusted p < 0.05) upregulation in controls and patients with idiopathic PAH (IPAH), congestive tissue disease associated PAH (CTD-PAH) and congenital heart disease PAH (CHD-PAH). Results are shown as scatter plot and lines indicate means and SD. \* Adjusted p < 0.05.

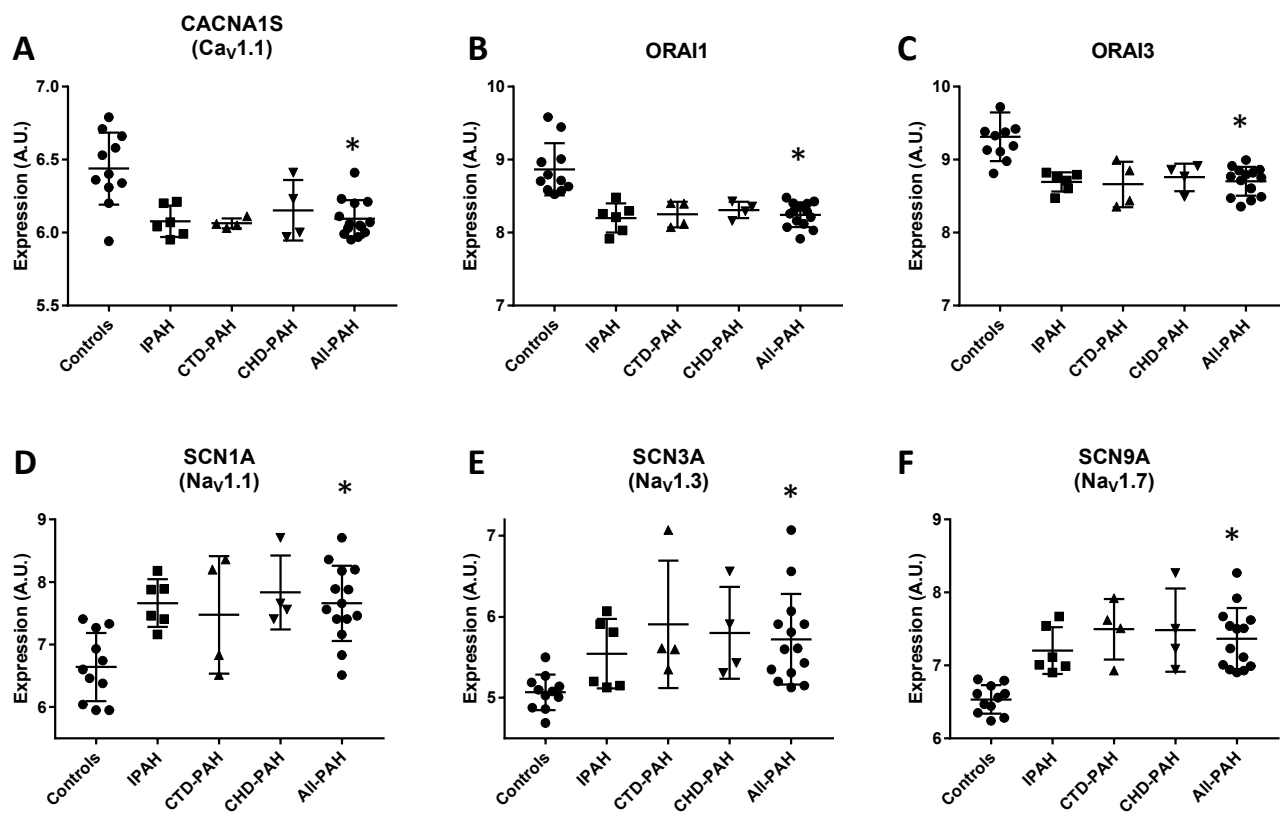

**Supplementary figure 4.** mRNA expression of Ca<sup>2+</sup> and Na<sup>+</sup> channel genes with a large (> 2 fold) and significant (adjusted  $p < 0.05$ ) change in controls and patients with idiopathic PAH (IPAH), congestive tissue disease associated PAH (CTD-PAH) and congenital heart disease PAH (CHD-PAH). Results are shown as scatter plot and lines indicate means and SD. \* Adjusted  $p < 0.05$ .

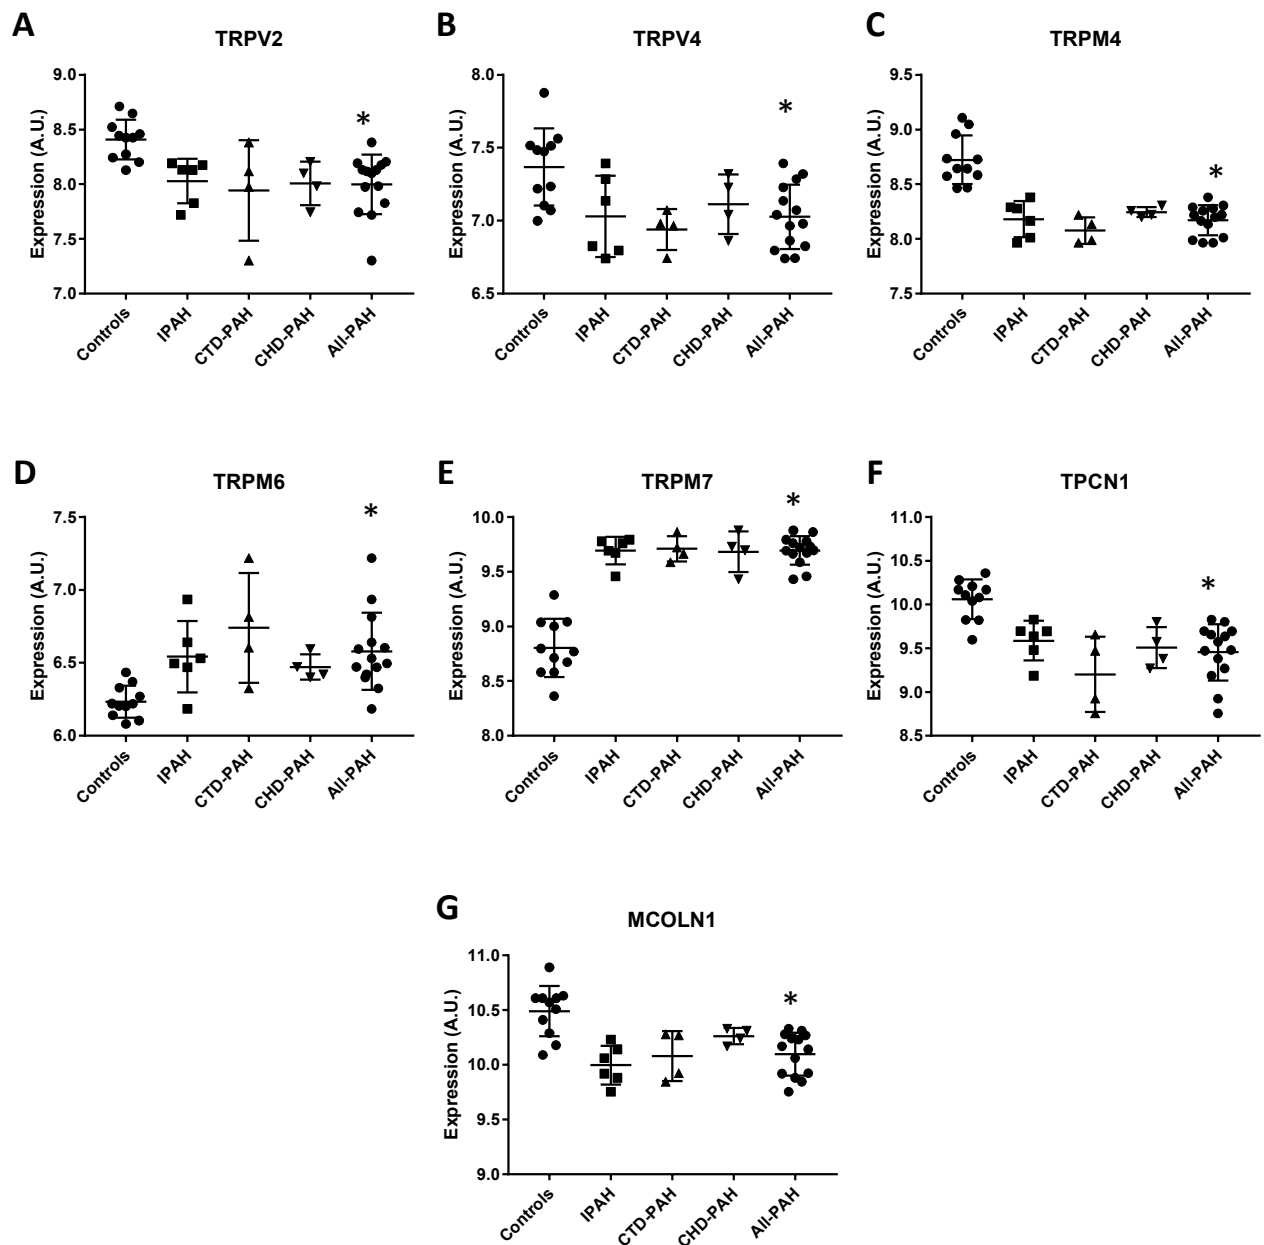

**Supplementary figure 5.** mRNA expression of TRP channels genes with a large (> 2 fold) and significant (adjusted  $p < 0.05$ ) change in controls and patients with idiopathic PAH (IPAH), congestive tissue disease associated PAH (CTD-PAH) and congenital heart disease PAH (CHD-PAH). Results are shown as scatter plot and lines indicate means and SD. \* Adjusted  $p < 0.05$ .

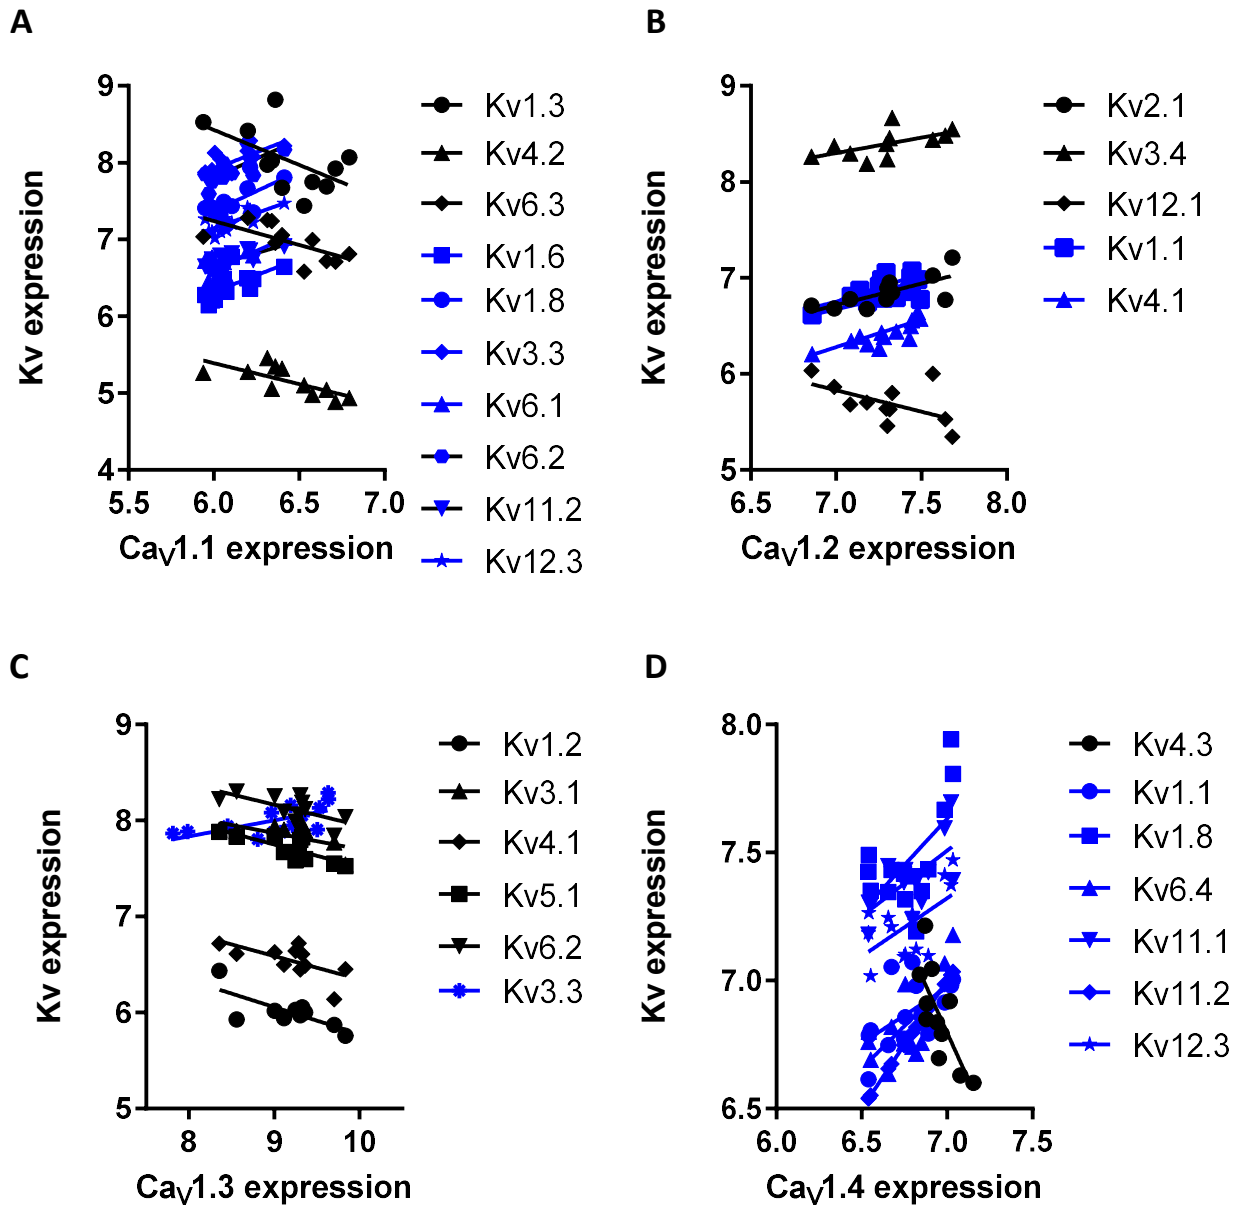

**Supplementary figure 6.** Significant correlations of mRNA expression of Ca<sub>v</sub>1.X channels with Kv channels in controls (black symbols) and PAH patients (blue symbols).
